# Supplementary material for: Reducing Chemotherapy-Induced DNA Damage via nAChR-Mediated Redox Reprograming—A New Mechanism for SCLC Chemoresistance Boosted by Nicotine
Source: MDPI journal article supplement (doi:10.3390/cancers14092272), 2022-05-02
Supplement: s1 [file s1]

**Table S1. Antibodies used for WB.**

| Antibodies                           | Company                   | Catalog number |
|--------------------------------------|---------------------------|----------------|
| P-ERK1/2 (T202/Y204)                 | Cell Signaling Technology | 9101S          |
| ERK1/2                               | Cell Signaling Technology | 9102S          |
| P-AKT (S473)                         | Cell Signaling Technology | 4060S          |
| AKT                                  | Cell Signaling Technology | 9272S          |
| Phospho-Histone H2A.X (Ser139)       | Invitrogen                | VH307705       |
| PCNA (PC10)                          | Cell Signaling Technology | 2586           |
| Cleaved PARP (Asp214) (D64E10)       | Cell Signaling Technology | 5625           |
| Anti-mouse IgG, HRP-linked Antibody  | Cell Signaling Technology | 7076           |
| Anti-rabbit IgG, HRP-linked Antibody | Cell Signaling Technology | 7074           |
| Mouse monoclonal anti-beta-actin     | Sigma Aldrich             | A2228          |

**Table S2. Primers used for qPCR.**

| Gene name      | Sequence (5'-3')      |                        |
|----------------|-----------------------|------------------------|
|                | Forward               | Reverse                |
| CHRNA3         | GGTGGACGACAAGACCAAAG  | GGGAAGTAGGTCACGTCGATT  |
| CHRNA4         | GGAGGGCGTCCAGTACATTG  | GAAGATGCGGTCGATGACCA   |
| CHRNA2         | CAATGCTGACGGCATGTACGA | CACGAACGGAACCTTCATGGTG |
| $\beta$ -actin | CATGTACGTTGCTATCCAGGC | CTCCTTAATGTCACGCACGAT  |

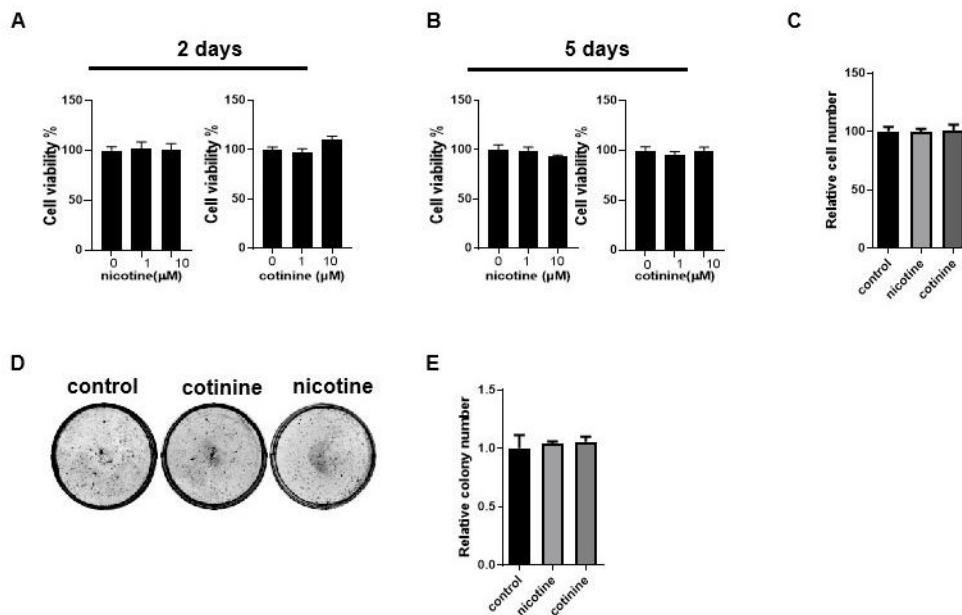

**Figure S1.** Nicotine or cotinine exposure has no effect on DMS53 cell proliferation. **A** and **B**) Cell titer blue assay results showed that nicotine or cotinine exposure for 2 days (**A**) or 5 days (**B**) has no effects on SCLC cell viability. **C**) Nicotine or cotinine exposure for 5 days has no influence on DMS53 cell proliferation. **D** and **E**) Colony formation analysis showed that nicotine or cotinine treatment has no effect on DMS53 cell colony number.

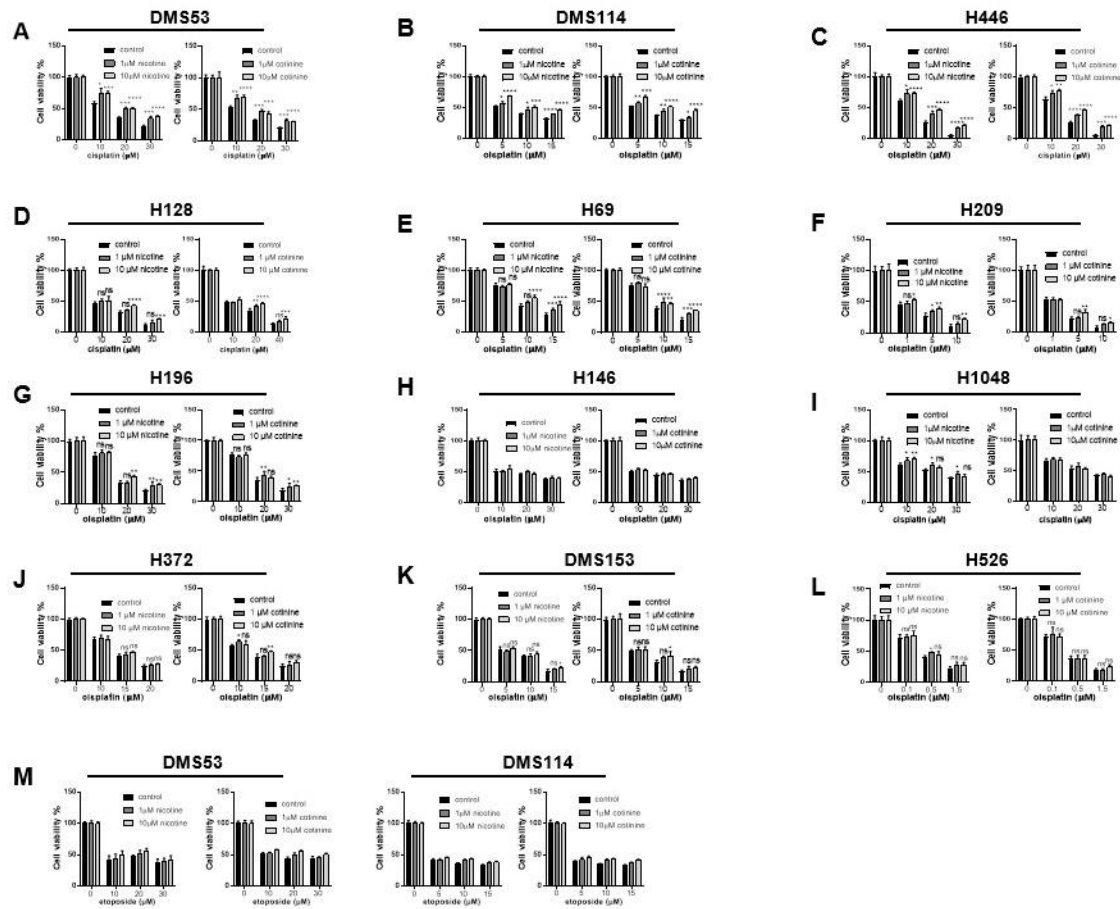

**Figure S2.** The effects of nicotine or cotinine exposure on the cytotoxicity of cisplatin and etoposide among different SCLC cells. **A-L)** DMS53, DMS114, H446, H128, H69, H209, H196, H146, H1048, H372, DMS153 and H526 cells were treated with cisplatin alone, or together with nicotine or cotinine and cell viability was measured by cell titer blue assay. **M)** DMS53 and DMS114 cells were treated with etoposide alone, or together with nicotine or cotinine and cell viability was measured. One-way analysis of variance (ANOVA) was used for data analysis. \*,  $P<0.05$ ; \*\*,  $P<0.01$ ; \*\*\*,  $P<0.001$ , \*\*\*\* $P<0.0001$ .

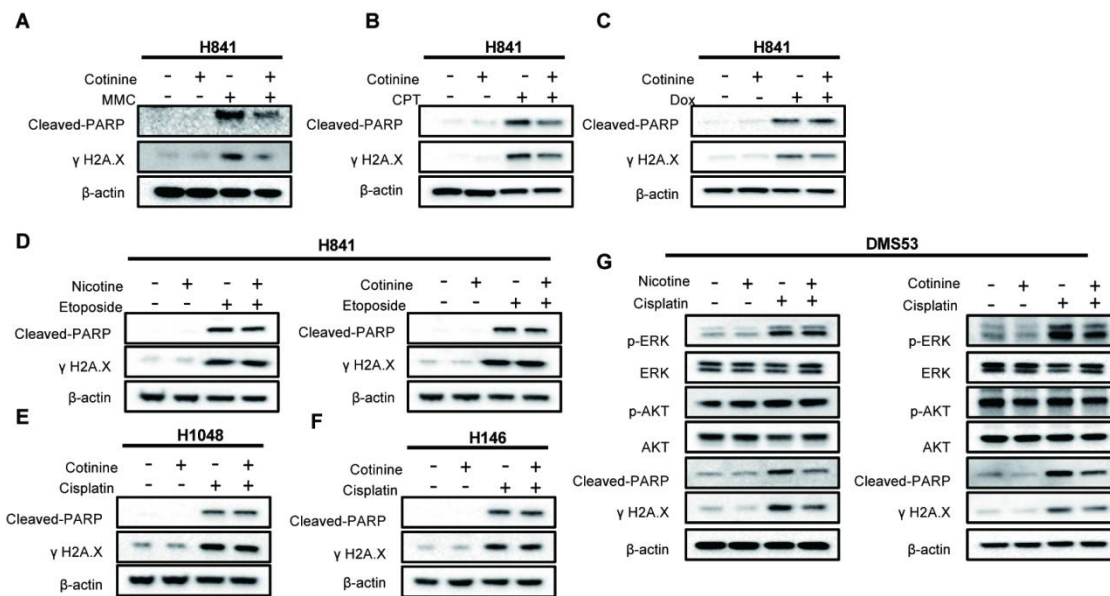

**Figure S3.** Effects of nicotine or cotinine on different chemotherapeutic agents exposure among different SCLC cells with respect to DNA damage and cell apoptosis. **A-C)** H841 cells were treated with MMC (**A**), CPT (**B**) or Dox (**C**) alone, or together with cotinine and Western blot analysis was performed by using antibodies as indicated. **D)** H841 cells were treated with etoposide alone, or together with nicotine or cotinine and  $\gamma$ H2A.X and cleaved-PARP were analyzed. **E-F)** H1048 and H146 were treated with cisplatin alone, or together with nicotine or cotinine and  $\gamma$ H2A.X and Cleaved-PARP were analyzed. **G)** DMS53 cells were treated with cisplatin alone, or with nicotine or cotinine and Western blot analysis was performed by using antibodies as indicated. The whole blots could be found in the Figure S6.

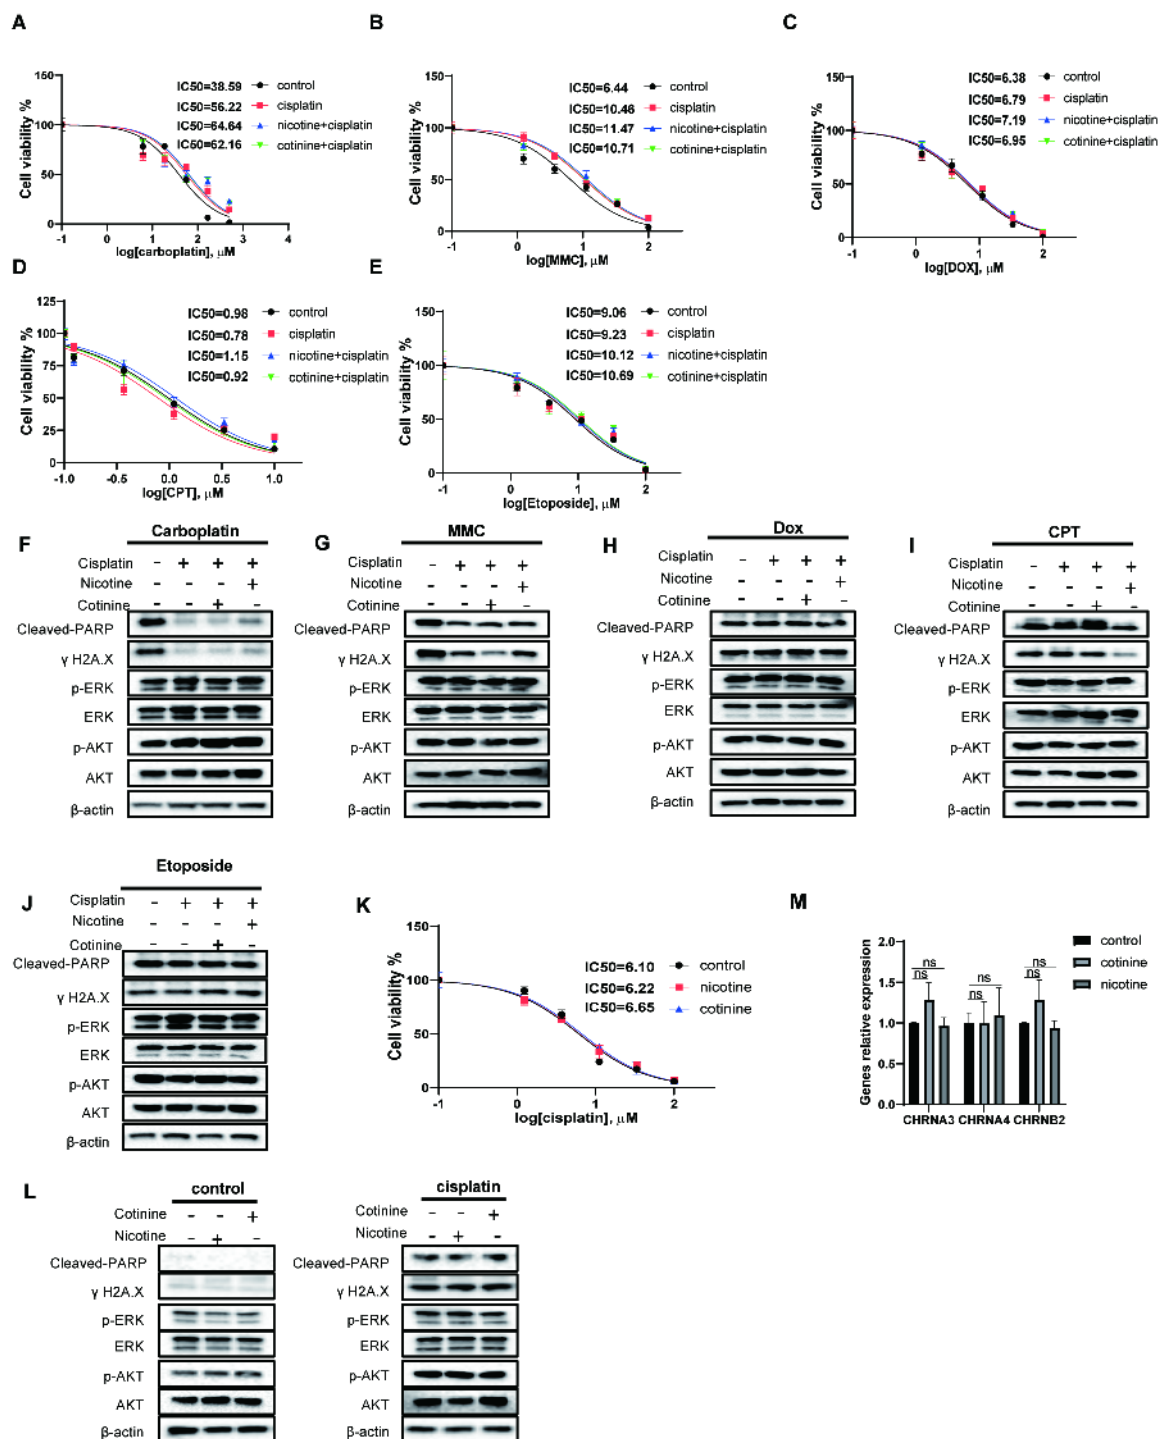

**Figure S4.** Cross-resistance of cisplatin-resistant H841 isogenic cell lines to other therapies. **A-E**, Four isogenic H841 cells with chronic exposure of cisplatin or in the presence of nicotine or cotinine cells were treated with carboplatin, MMC, DOX, CPT or etoposide for 48h with IC<sub>50</sub>

measured by Cell Titer Blue assays. **F-J**, Western blot analysis of the four isogenic H841 cells upon the treatment of carboplatin, MMC, DOX, CPT or etoposide. **K and L**, Chronic exposure of nicotine or cotinine alone induced minimal resistance to cisplatin. **M**, Chronic exposure of nicotine or cotinine alone induced minimal up-regulation in CHRNA4, CHRNA2, and CHRNA3. The whole blots could be found in the Figure S6.

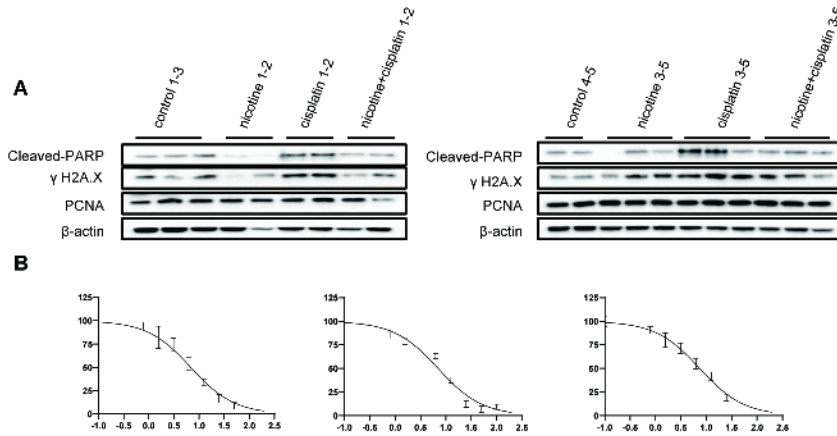

**Figure S5.** Nicotine enhances chemoresistance to cisplatin in a mouse xenograft model. **A**, Western blotting was used to determine the protein levels of cleaved-PARP,  $\gamma$ -H2AX, PCNA, and  $\beta$ -actin in the tumor samples from 5 individual mice in each group. **B**, Tumors from each group were digested into single cells (five tumors were combined in each group) and 20,000 cells were seeded into each well of 96-well plate. After 3-day cisplatin incubation, IC<sub>50</sub>s of these cells to cisplatin were measured by Cell Titer Blue assay. The whole blots could be found in the Figure S6.

Figure 3A & 3B

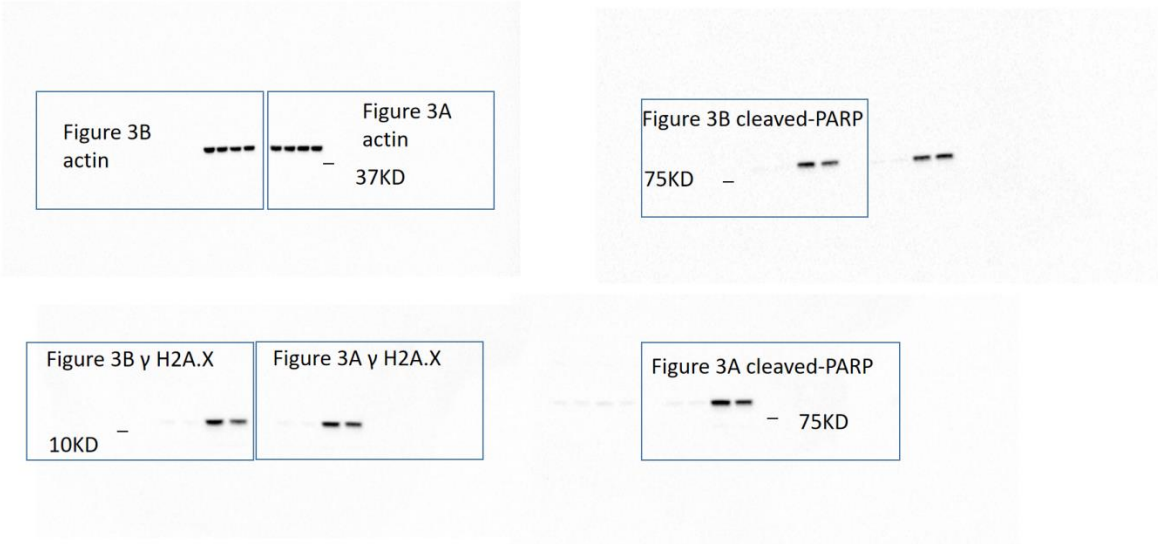

Figure 3 I

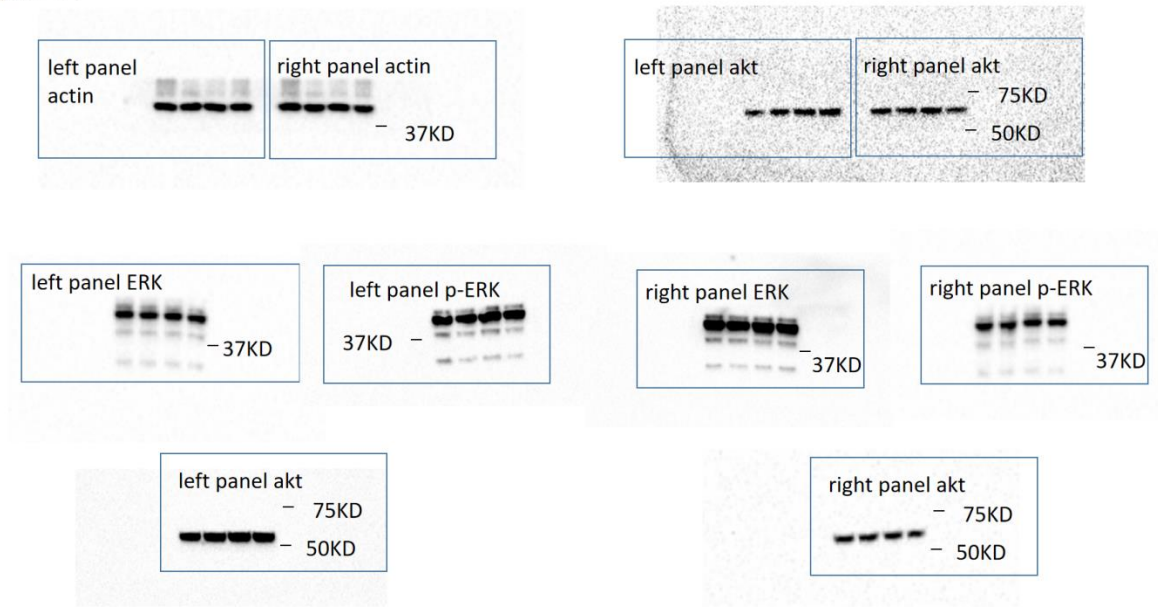



Figure 6C

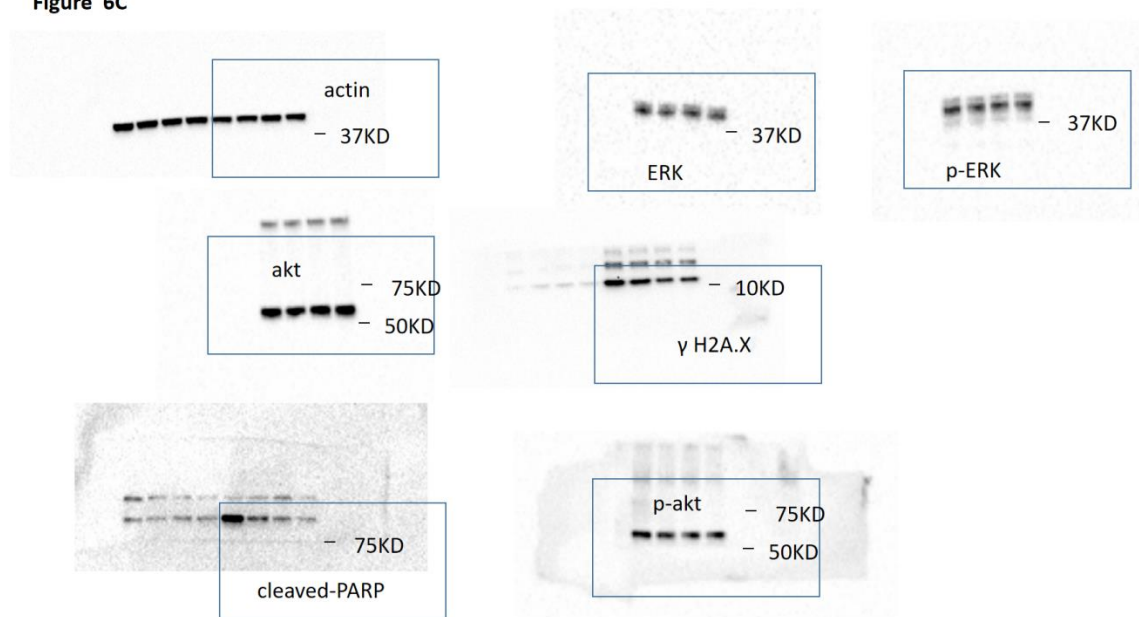

Figure 7E

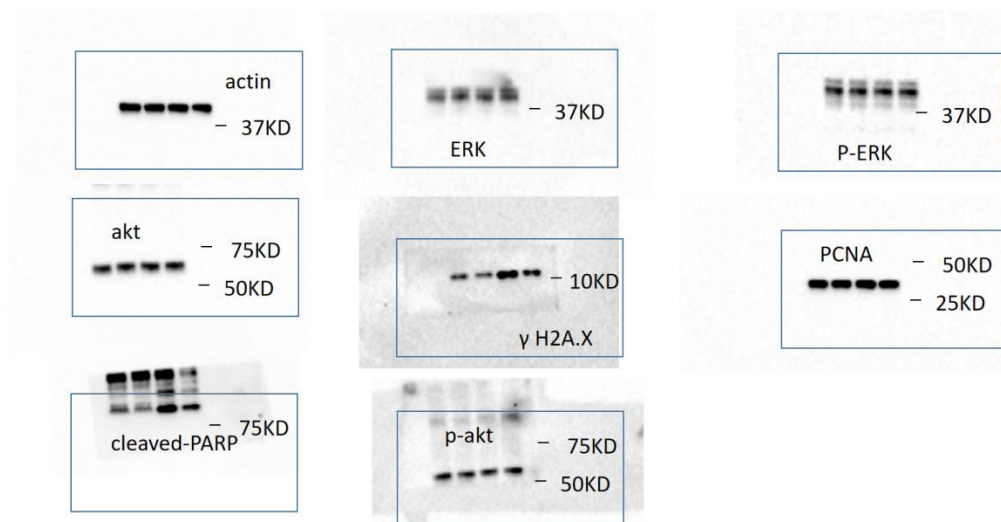

**Figure S3**

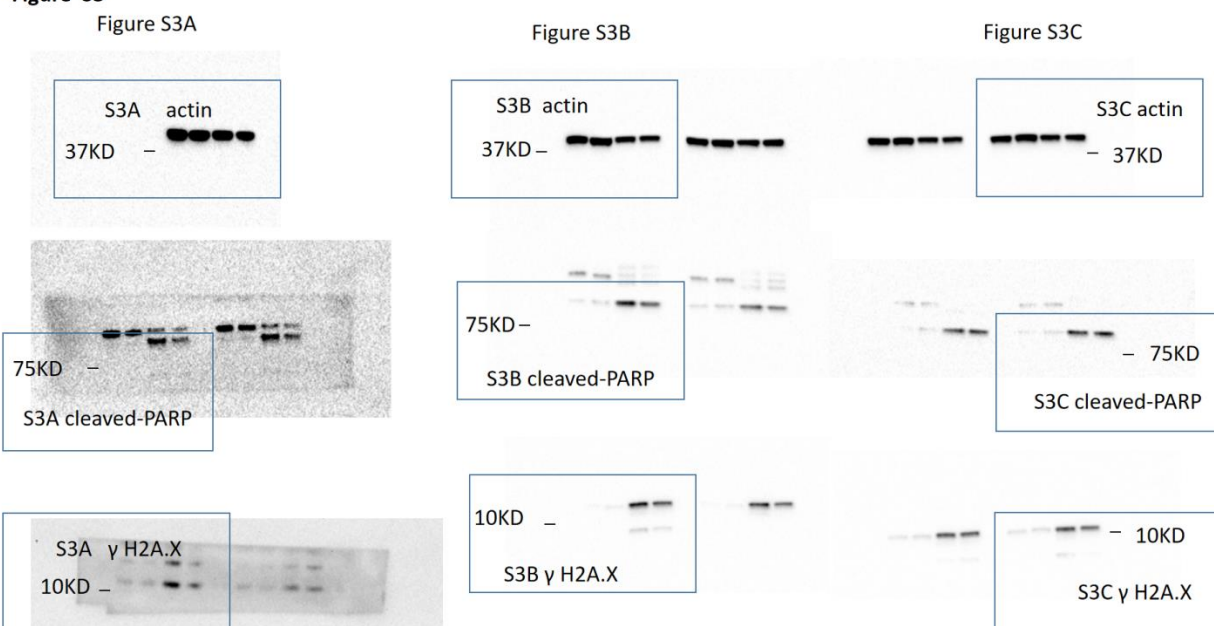

**Figure S3**

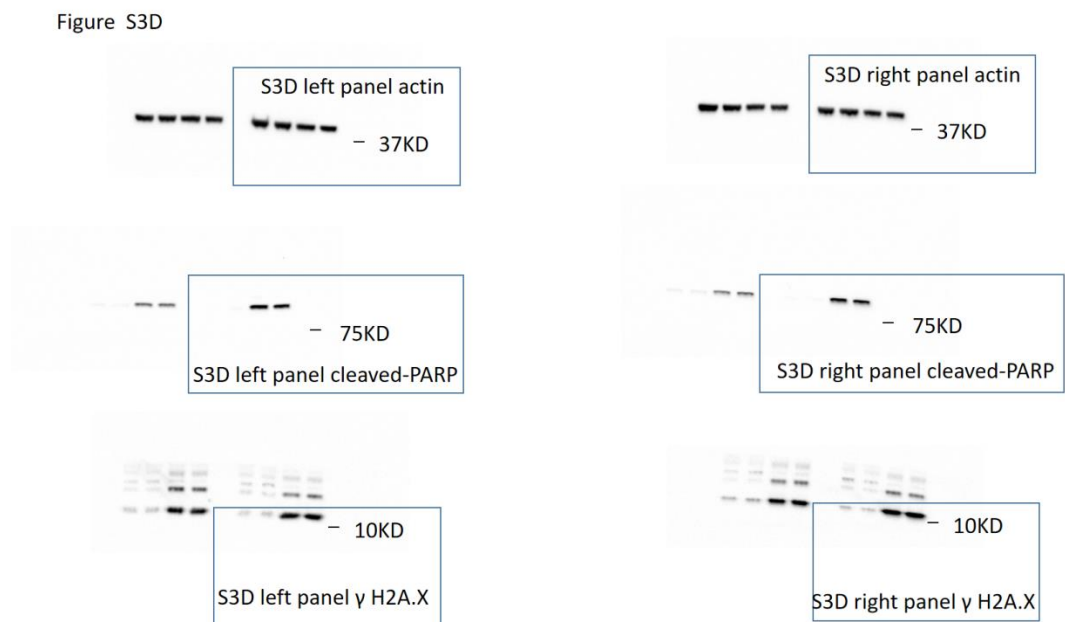

**Figure S3**

Figure S3E

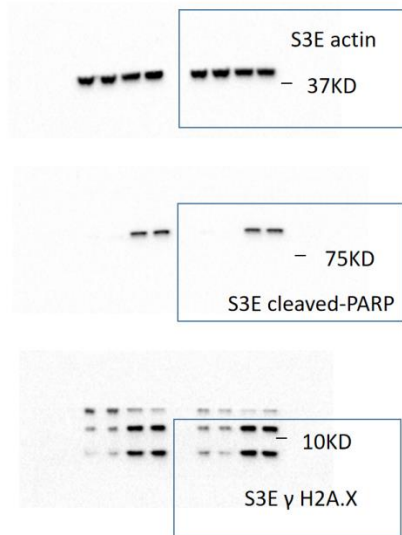

Figure S3F

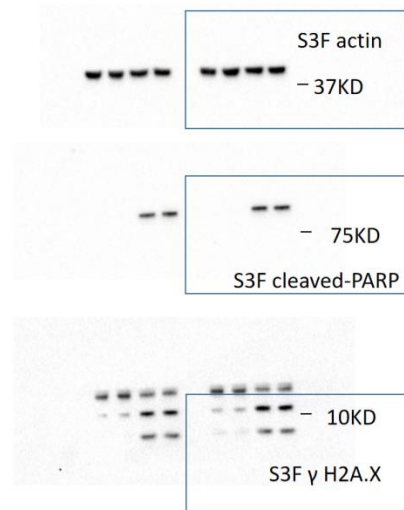

**Figure S3**

Figure S3G left panel

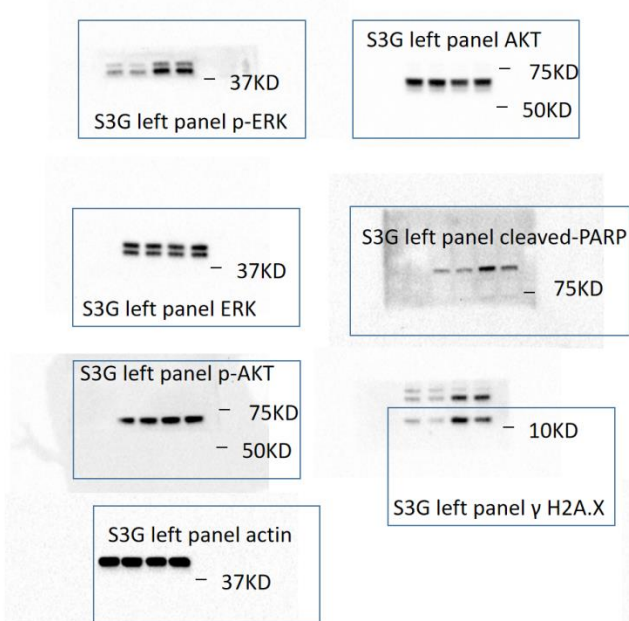

Figure S3G right panel

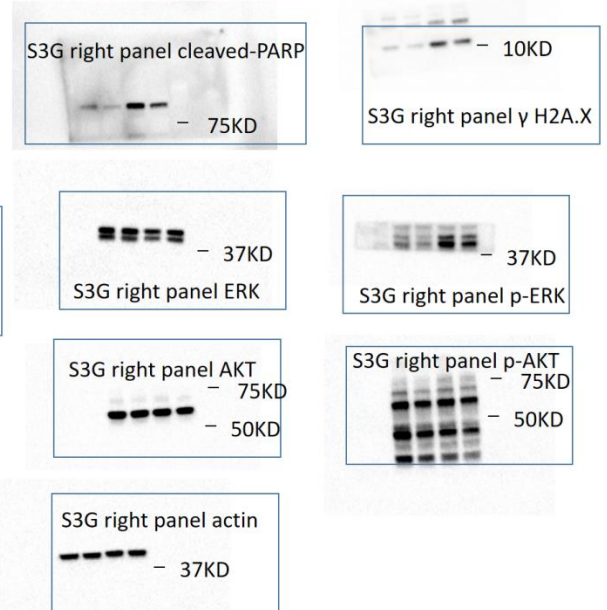

Figure S4

Figure S4F

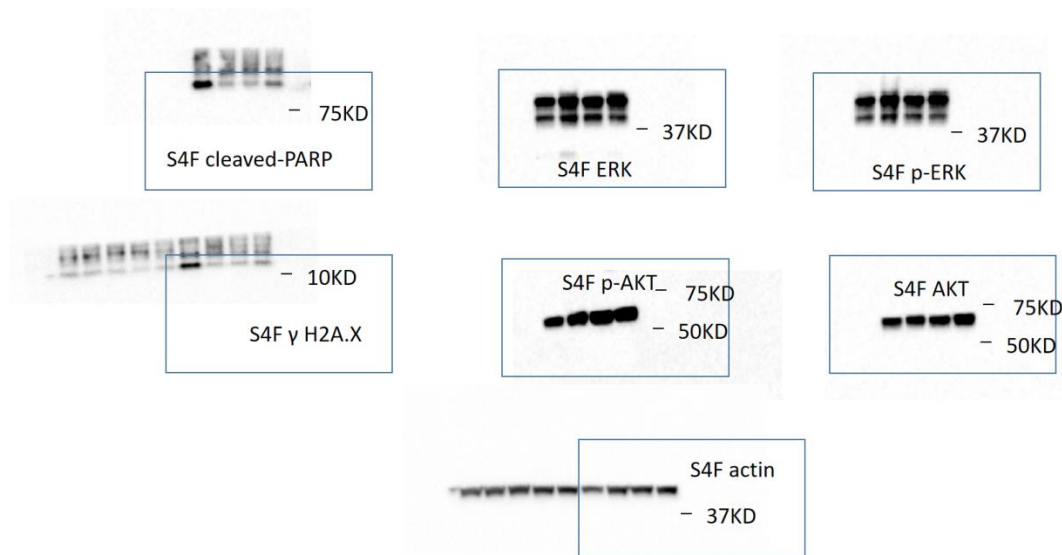

Figure S4

Figure S4G

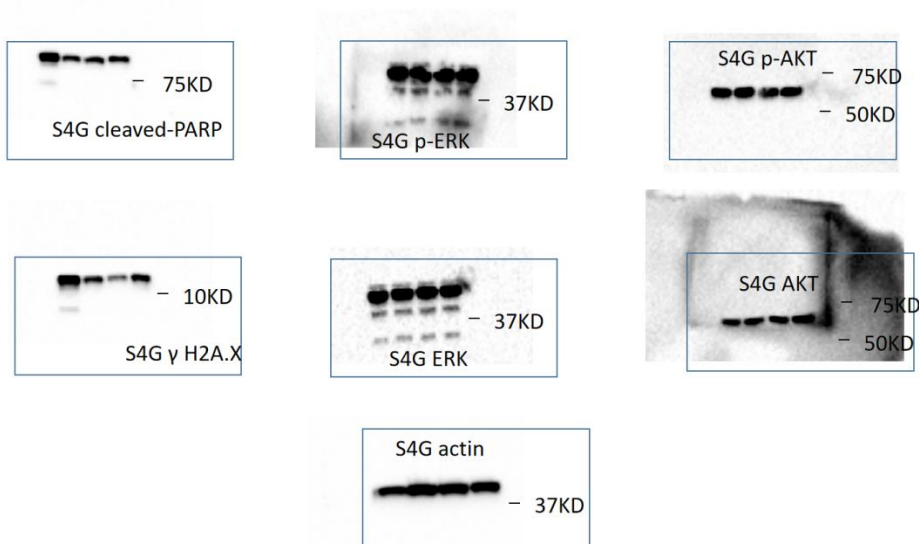

Figure S4

Figure S4H

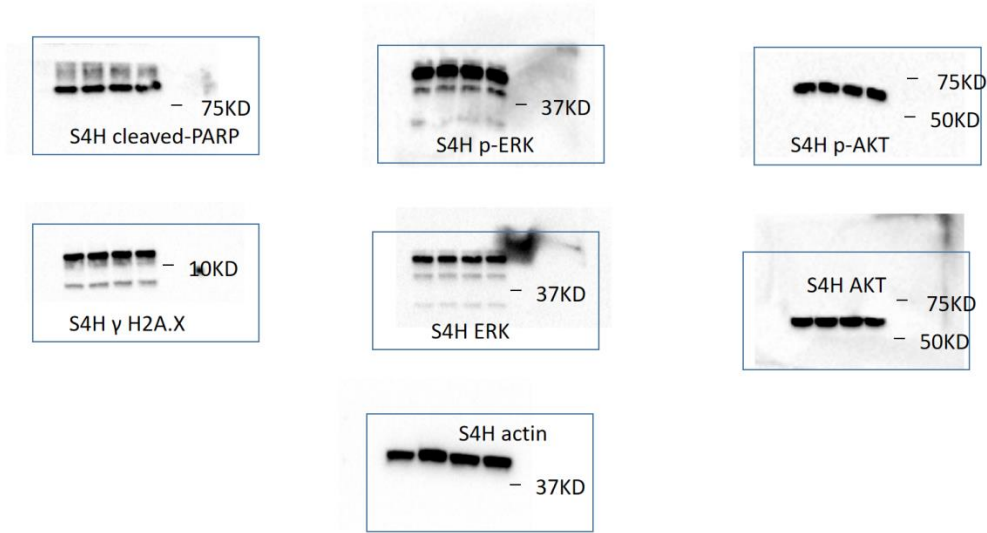

Figure S4

Figure S4I

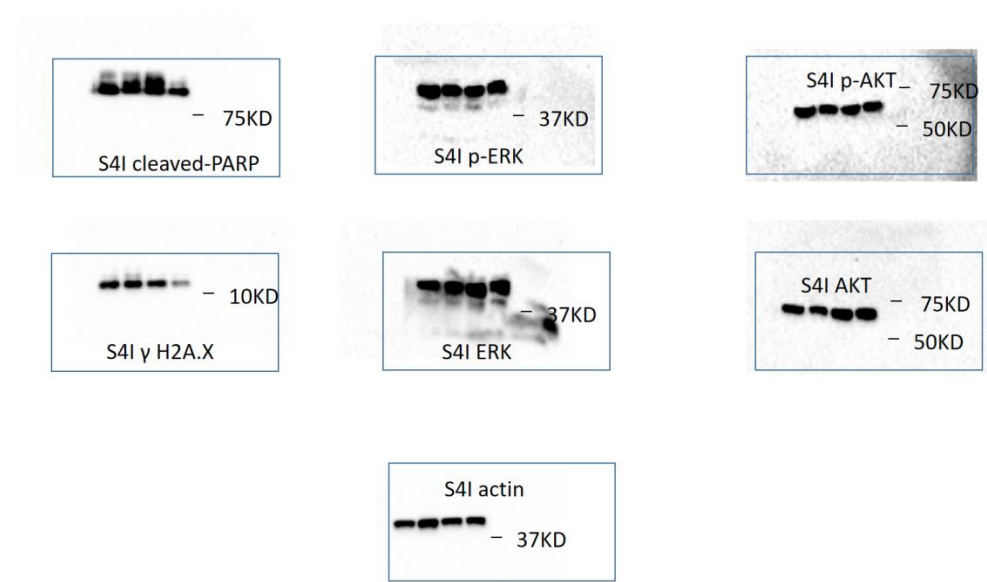

Figure S4

Figure S4J

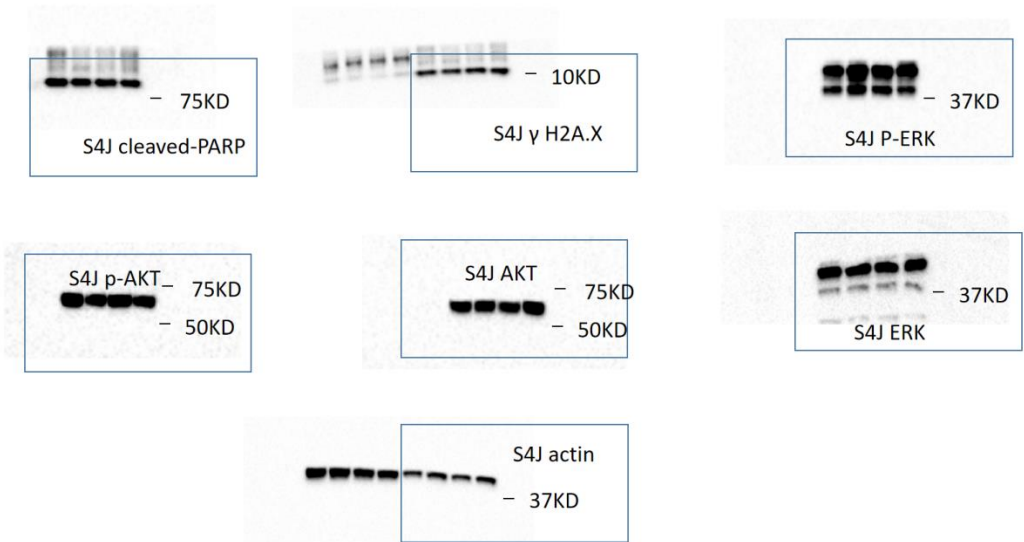

Figure S4

Figure S4L

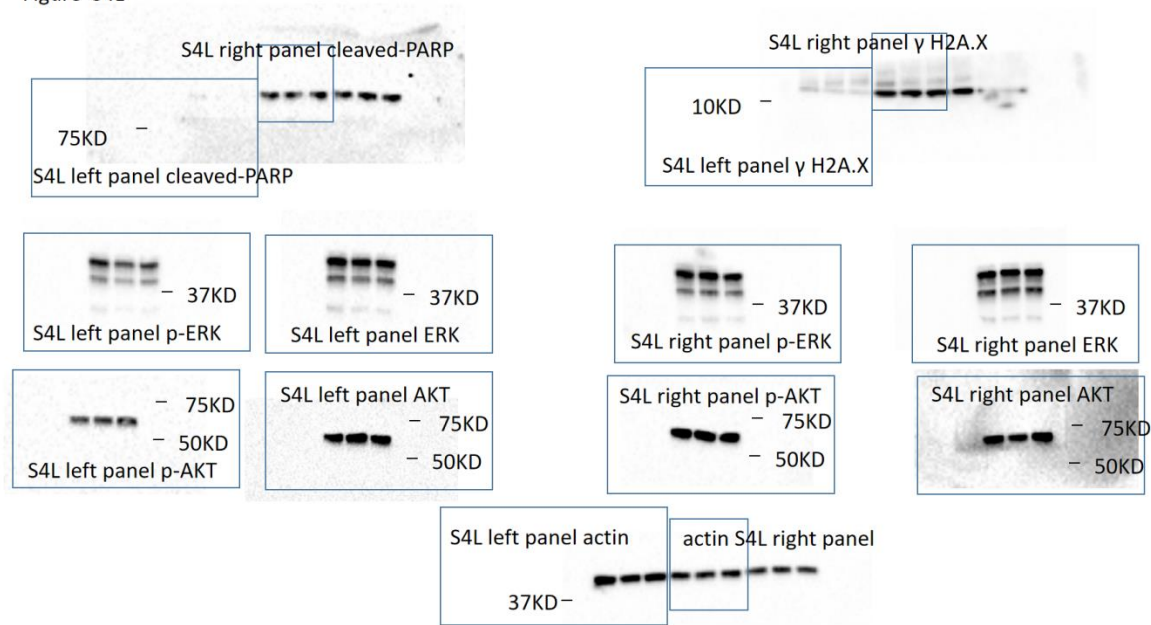

**Figure S5**

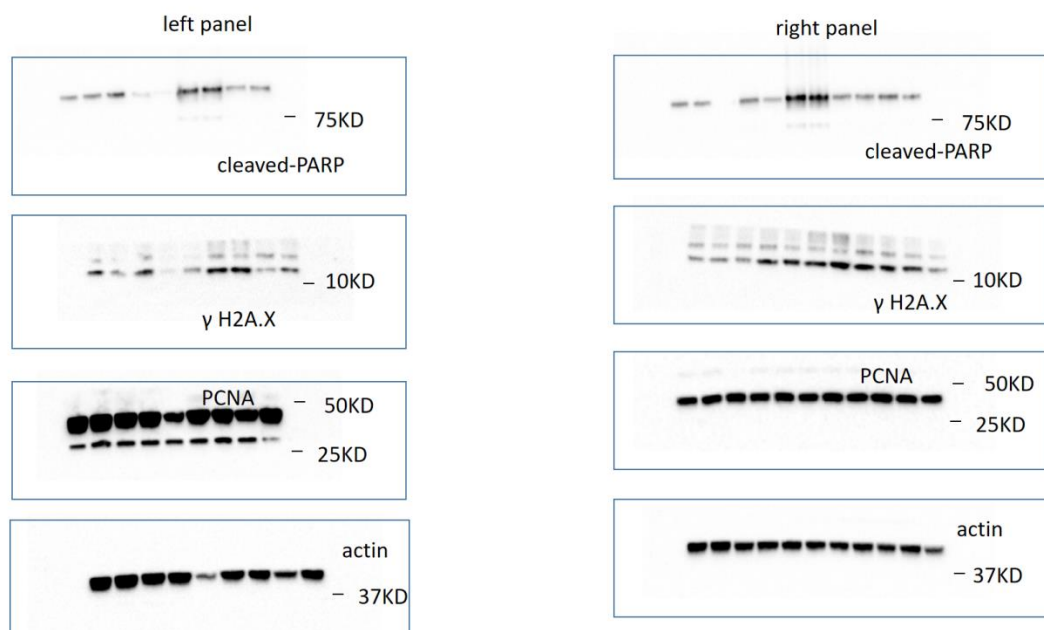

**Figure S6.** The whole blots.
